# Supplementary material
Source: Research Square preprint supplement (doi:10.21203/rs.3.rs-9620435/v1)
Supplement: Supplementary file 1 [file 6eca551073852d415b6a05c8.docx]

**Supplementary Material**

Subcutaneous Perianal Nerve Division versus Intradermal Methylene Blue Injection for Refractory Idiopathic Pruritus Ani: A Retrospective Two-Arm Comparative Study.

**eMethods 1. Propensity-score model and weight construction**

The propensity score (PS) was estimated by a logistic regression of treatment assignment (SPND vs MBI) on the prespecified covariate set: age, sex, body mass index, symptom duration, baseline itch VAS/NRS, sleep disturbance, lichenification, and the number of failed conservative therapies. Estimated PSs were truncated at [0.02, 0.98] before weight construction to limit the influence of extreme weights. Stabilized inverse probability of treatment weights (IPTW) were then computed as Pr(Z = z) / Pr(Z = z | X), where Z is treatment assignment and X is the covariate vector. The weight construction is consistent with the method described by Austin and Stuart (2015).

**eMethods 2. Component-wise sensitivity analysis of the composite primary endpoint**

The primary endpoint is a composite (12-month VAS/NRS ≤ 1 OR ≥ 75% reduction from baseline). Because the SPND arm started from a higher baseline VAS/NRS, the percentage-reduction component is more readily attainable in this arm. To examine whether either component drives the primary comparison, the two components were analyzed separately, each as a binary endpoint, in crude and IPTW logistic regressions. Results are in eTable 2.

**eMethods 3. Multiple imputation (MI) sensitivity**

Two MI sensitivity analyses were performed. (a) MI for missing 12-month outcomes (n = 7 records lost to follow-up before 12 months): imputations were drawn from a logistic model fit on completers using treatment plus the prespecified covariate set; M = 20 imputations were combined by Rubin's rules. Three deterministic tipping-point analyses were also performed (all SPND-LTFU non-responders; all MBI-LTFU non-responders; all LTFU non-responders). (b) MI for missing recurrence dates among recurrent records (n = 6): missing recurrence times were imputed from a Weibull distribution fit on the observed (uncensored) recurrence times, drawn within the individual's recorded follow-up window; an exploratory Cox model was refit on each imputed dataset and pooled by Rubin's rules. Results are in eTables 5 and 6.

**eMethods 4. E-value**

E-values were computed for the IPTW-adjusted point estimate and for the limit of the 95% CI closer to the null, following the formulation of VanderWeele and Ding (2017). Because the primary outcome is non-rare, the OR was first converted to an approximate risk ratio using the approximation RR ≈ OR / [1 − p₀ + p₀·OR], where p₀ is the response proportion in the comparator (MBI) arm. The E-value is then computed from the resulting RR by E = RR + sqrt(RR · (RR − 1)).

**eTable 1. Standardized mean differences before and after IPTW**

| Covariate | Pre-weighting |SMD| | Post-weighting |SMD| | Comment |
| --- | --- | --- | --- |
| Age | 0.270 | 0.039 | Balanced |
| Male sex | 0.030 | 0.031 | Balanced |
| Body mass index | 0.387 | 0.190 | Substantially improved |
| Symptom duration (mo) | 0.768 | 0.289 | Substantially improved |
| Baseline itch VAS/NRS | 0.839 | 0.174 | Substantially improved |
| Sleep disturbance | 0.550 | 0.016 | Balanced |
| Lichenification | 0.471 | 0.144 | Substantially improved |
| Failed conservative therapies (No.) | 0.573 | 0.356 | Improved but residual imbalance |

Notes: |SMD| < 0.10 is the conventional threshold for adequate balance. After IPTW, 5 of 8 covariates fell below 0.10. Two covariates (failed conservative therapies, |SMD| ≈ 0.36; symptom duration, |SMD| ≈ 0.29) retained residual imbalance after weighting; this residual imbalance is acknowledged as a limitation in the main text and contributes to the interpretation that residual confounding cannot be excluded.

**eFigure 1. Love plot of covariate balance before and after IPTW**


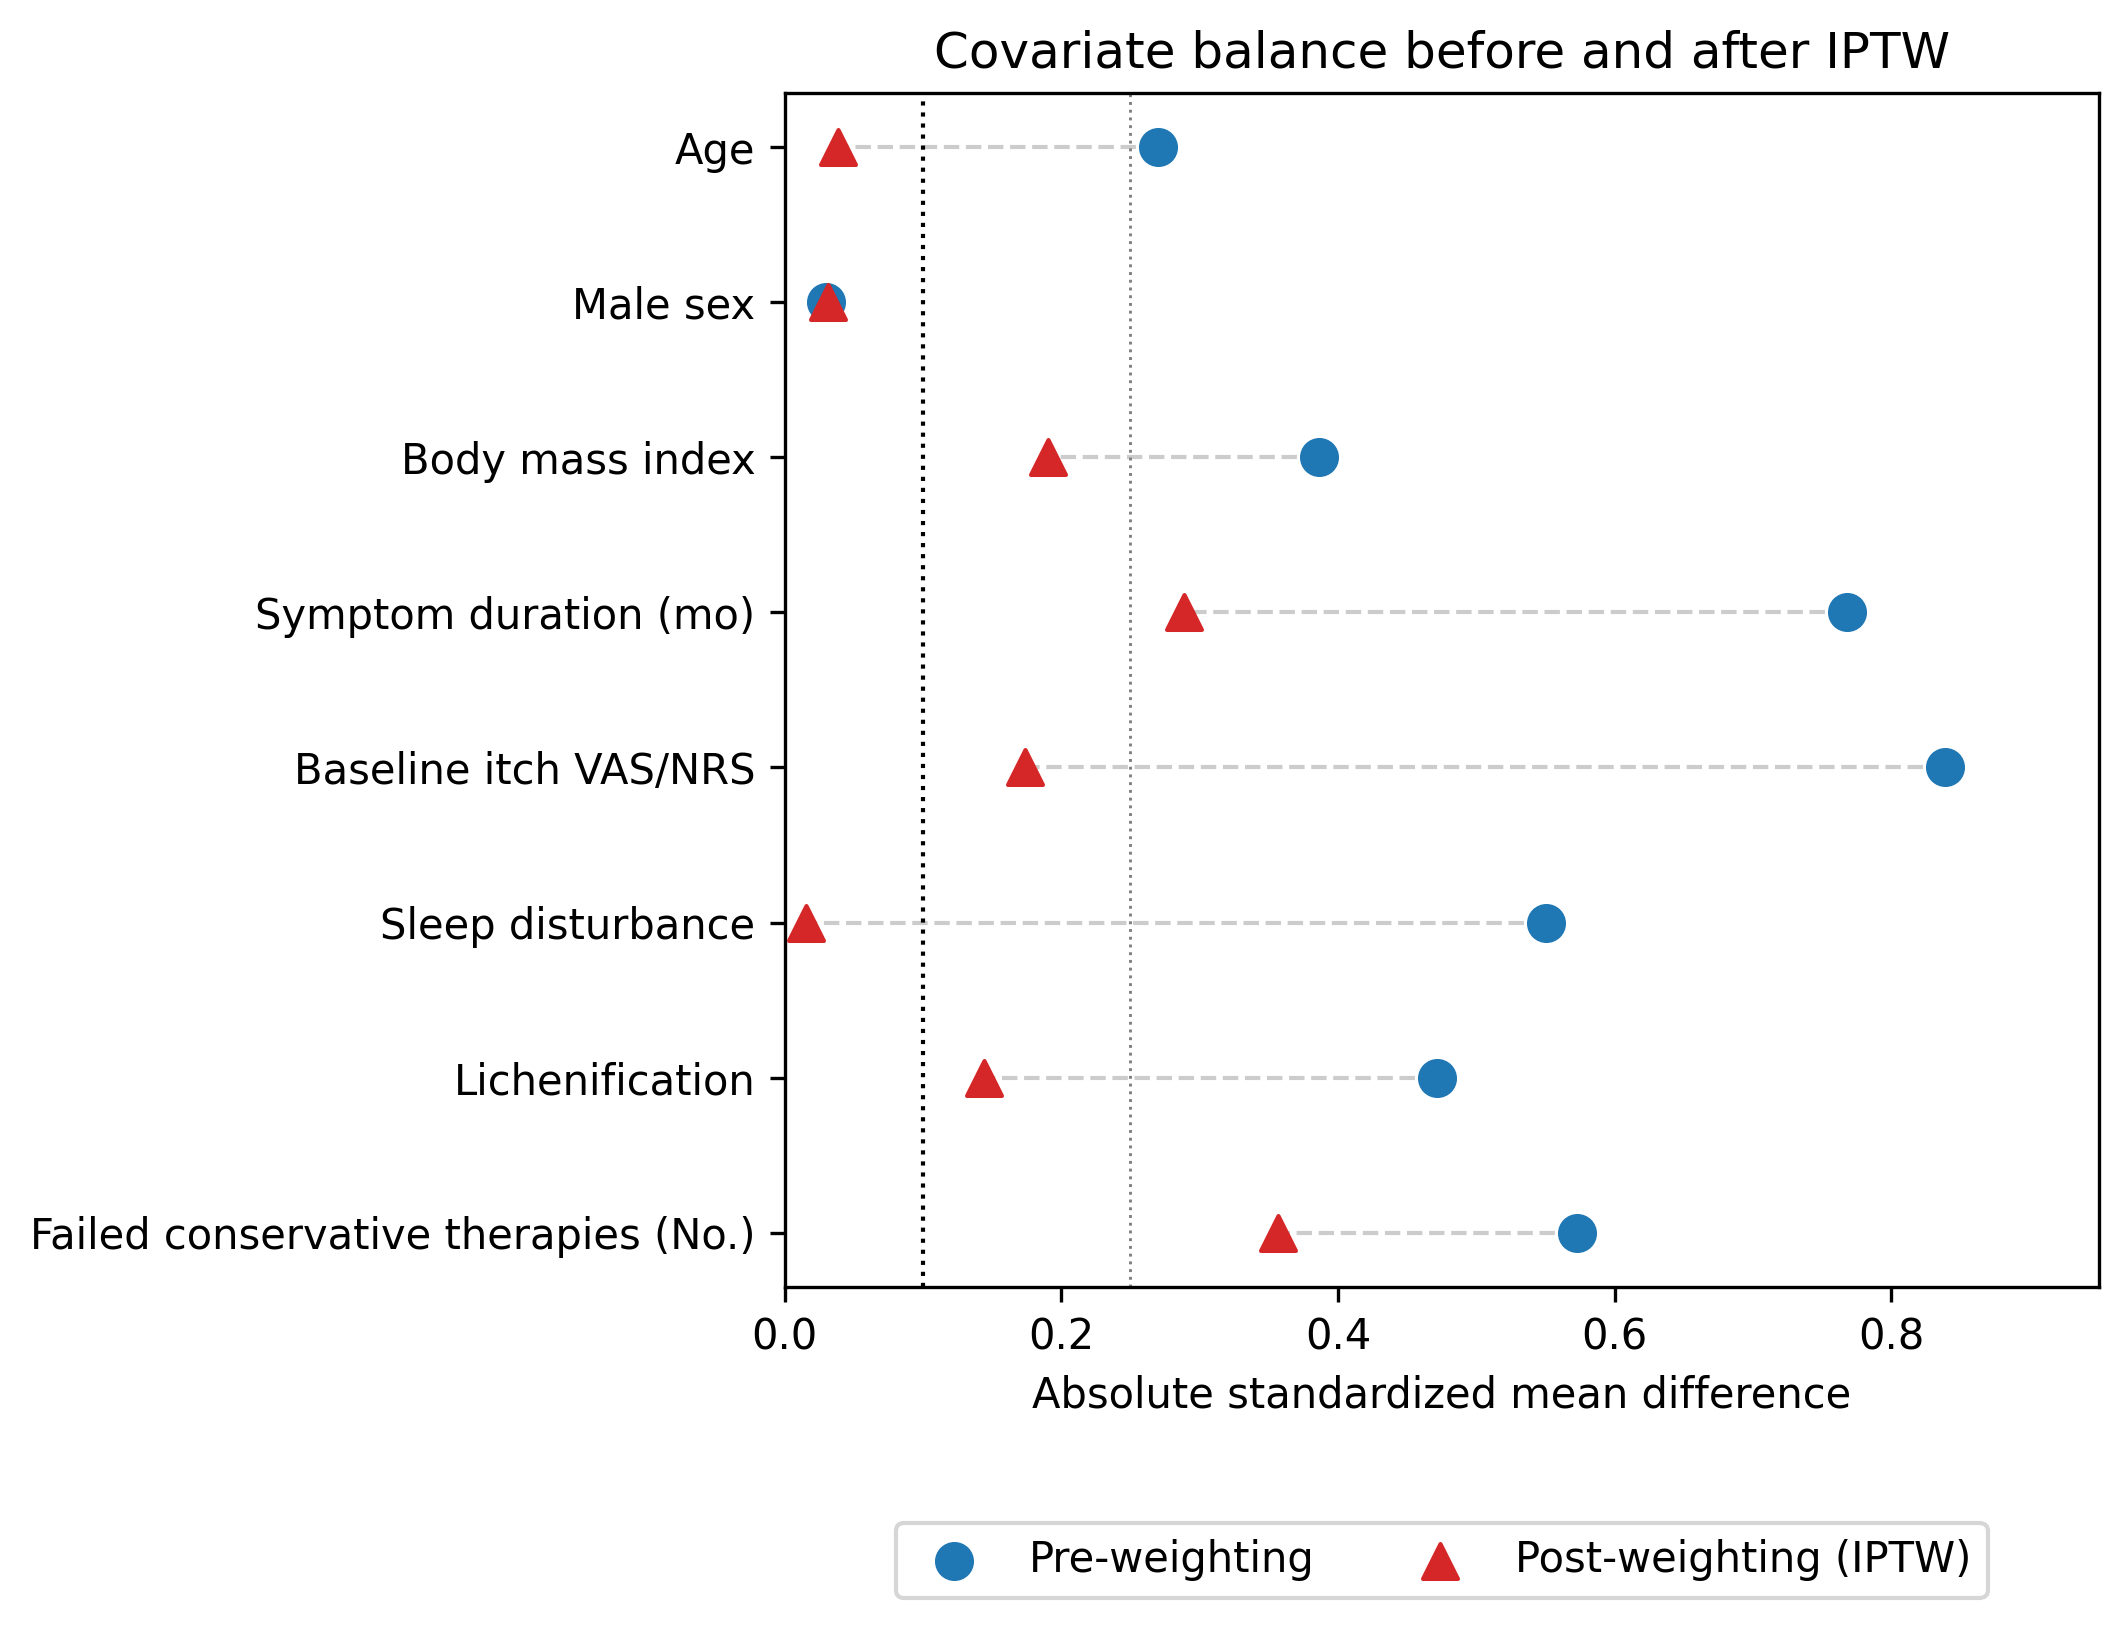


Absolute standardized mean differences (SMDs) for each prespecified covariate, before (blue circles) and after (red triangles) IPTW. Vertical reference lines at |SMD| = 0.10 (dotted black) and |SMD| = 0.25 (dotted grey).

**eFigure 2. Distribution of stabilized weights and effective sample size**


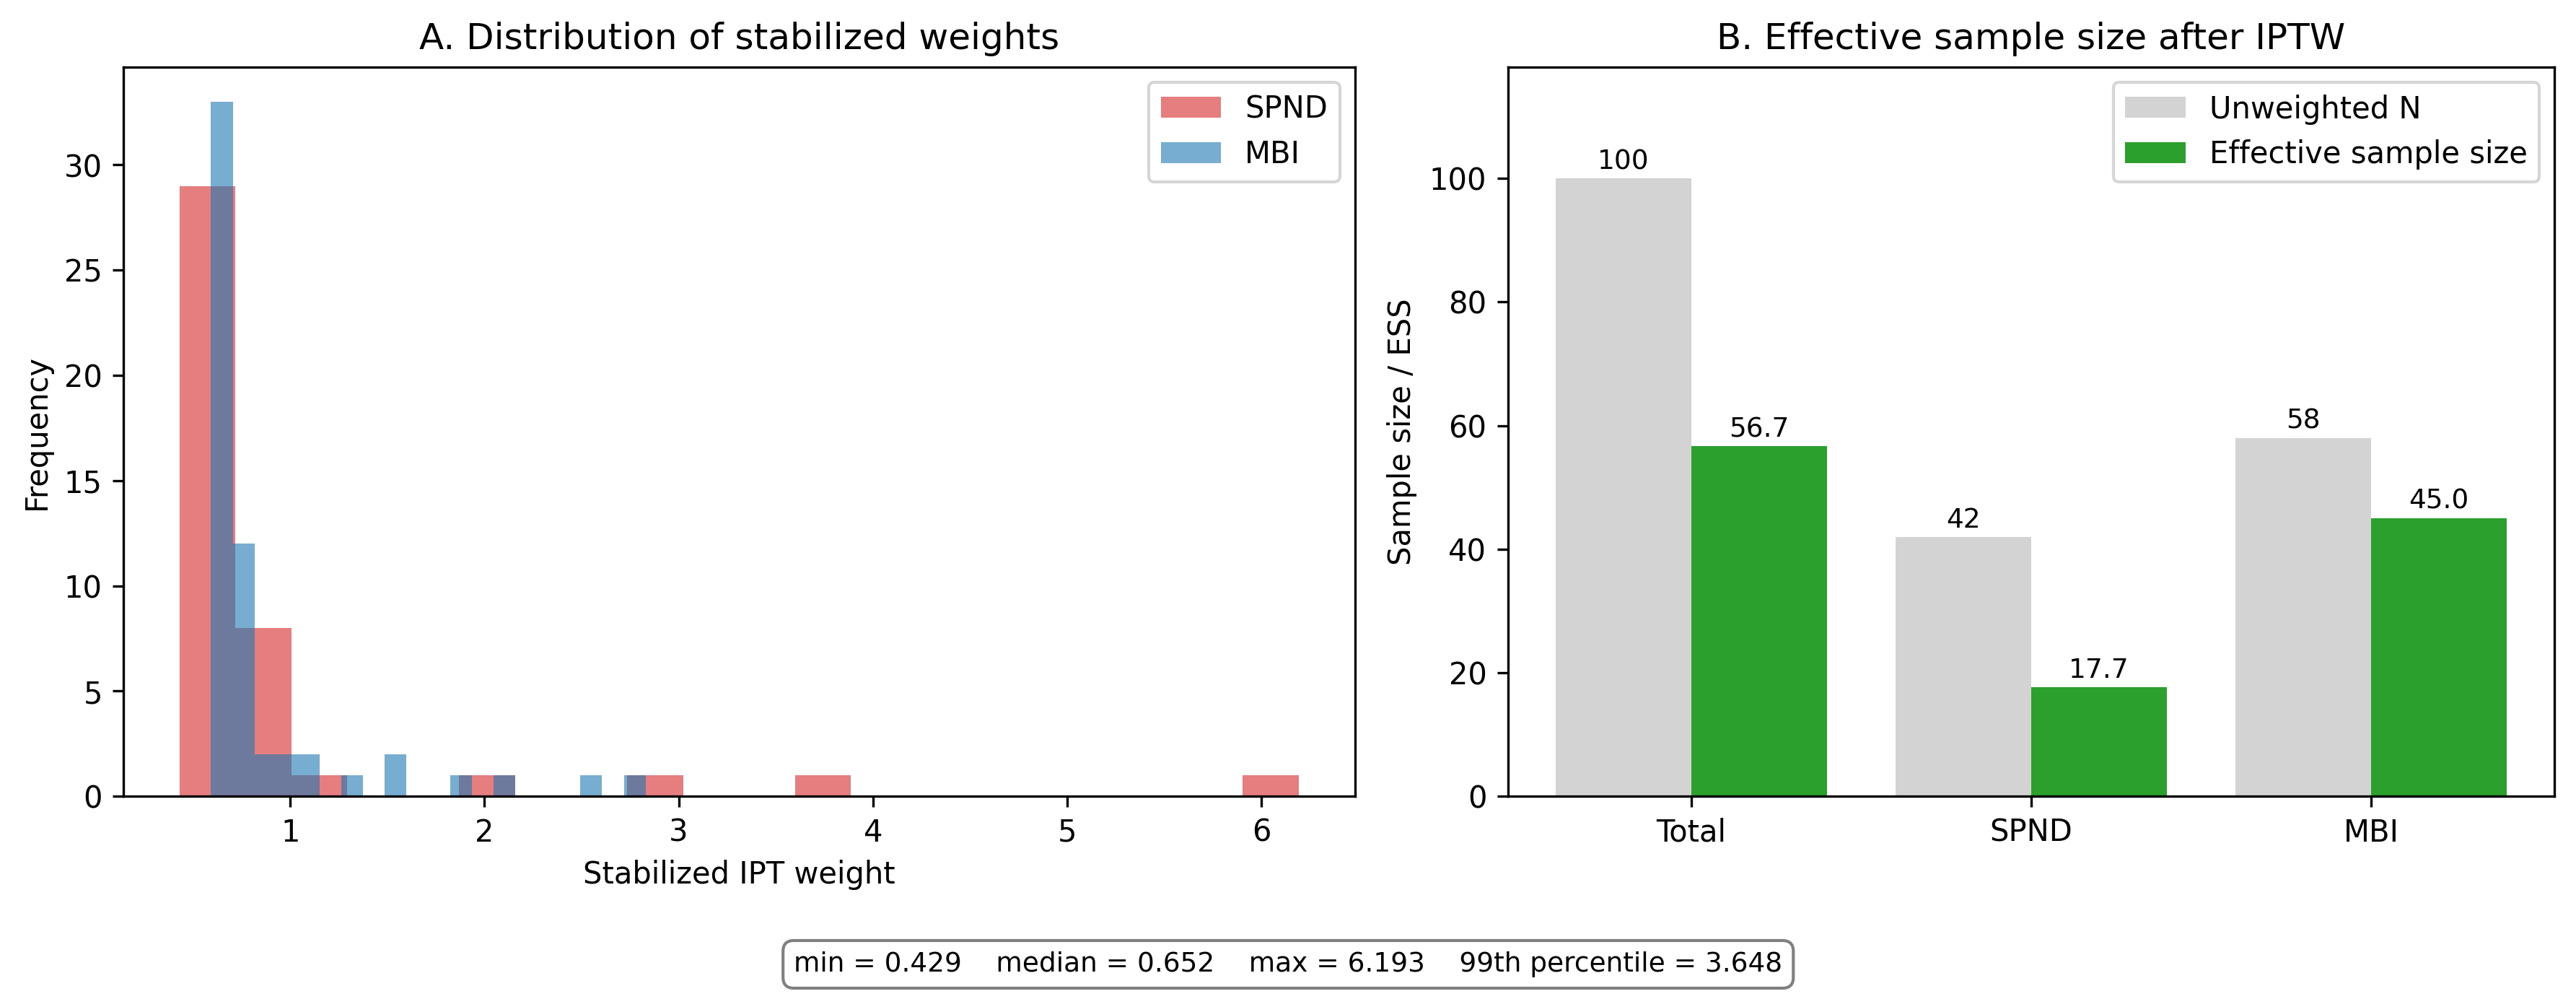


(A) Distribution of stabilized inverse probability of treatment weights, by arm. Min = 0.429, median = 0.652, max = 6.193, 99th percentile = 3.648. (B) Effective sample size (ESS) compared with unweighted N. Total N = 100; ESS = 56.66. ESS_SPND = 17.69 (unweighted n = 42); ESS_MBI = 45.04 (unweighted n = 58). The reduced ESS in the SPND arm reflects the cost of reweighting under treatment-selection imbalance and is acknowledged as a constraint on the precision of the IPTW-adjusted estimate.

**eTable 2. Component-wise sensitivity analysis of the composite primary endpoint**

| Endpoint | SPND | MBI | Fisher P | Crude OR (95% CI) | IPTW OR (95% CI) | Note |
| --- | --- | --- | --- | --- | --- | --- |
| VAS/NRS ≤ 1 alone | 22/39 (56.4%) | 28/54 (51.9%) | 0.68 | 1.2 (0.53–2.75) | 1.34 (0.55–3.25) | Stricter component |
| ≥ 75% reduction from baseline alone | 28/39 (71.8%) | 35/54 (64.8%) | 0.509 | 1.38 (0.57–3.38) | 1.3 (0.52–3.28) | Subsumes the ≤ 1 component in this cohort |
| Composite primary endpoint | 28/39 (71.8%) | 35/54 (64.8%) | 0.509 | 1.38 (0.57–3.38) | 1.3 (0.52–3.28) | Composite = either component met |

Notes: The OR for the VAS/NRS ≤ 1 component (1.20) is closer to the null than the OR for the ≥ 75% reduction component (1.38), consistent with the hypothesis that the percentage-reduction component partly reflects baseline-severity asymmetry. Both components, the composite, and the IPTW-adjusted version of each yield 95% CIs that include the null.

**eTable 3. E-value for the IPTW-adjusted primary endpoint**

| IPTW OR (point estimate) | 1.3 (95% CI 0.52–3.28) |
| --- | --- |
| p₀ (response proportion in MBI arm) | 0.648 |
| Approximate RR (point) | 1.089 |
| Approximate RR (95% CI) | 0.754–1.324 |
| E-value (point estimate) | 1.4 |
| E-value (CI bound closer to null) | 1.0 |
| CI includes the null? | Yes |
| Interpretation | An unmeasured confounder associated with both treatment assignment and the outcome by a risk ratio of at least 1.4-fold each, above and beyond the measured covariates, could explain away the observed point estimate. Because the 95% CI crossed the null, the data are already compatible with the absence of an effect, and the E-value for the CI is 1. |

**eTable 5. Multiple-imputation sensitivity for the IPTW-adjusted primary endpoint**

| Imputation scenario | Pooled OR | 95% CI | M |
| --- | --- | --- | --- |
| MAR (logistic-model imputation, M = 20) | 1.25 | 0.505–3.093 | 20 |
| Tipping-point: all SPND-LTFU = non-responders | 1.046 | 0.428–2.555 | 20 |
| Tipping-point: all MBI-LTFU = non-responders | 1.663 | 0.681–4.061 | 20 |
| Tipping-point: all LTFU = non-responders | 1.422 | 0.594–3.404 | 20 |

Notes: For comparison, the complete-case IPTW OR (n = 93) was 1.30 (95% CI, 0.52–3.28). All MI scenarios produced 95% CIs that include the null, indicating that the negative primary-endpoint finding is robust to plausible missing-data assumptions.

**eTable 6. Multiple-imputation sensitivity for the exploratory Cox HR**

| Analysis | HR (SPND vs MBI) | 95% CI | n events |
| --- | --- | --- | --- |
| Complete-case Cox (n = 87, events = 13) | 0.375 | 0.103–1.365 | 13 |
| MI for missing recurrence dates (M = 20) | 0.58 | 0.22–1.53 | 13 observed + 6 imputed = 19 |

Notes: P value for the complete-case Cox HR was 0.137 (log-rank P = 0.121 in the unadjusted Kaplan–Meier comparison shown in Figure 3 of the main manuscript). After imputation of the 6 missing recurrence dates, the pooled HR moved toward the null (0.58 vs 0.375 complete-case) and the 95% CI continued to include the null. The exploratory time-to-event findings should therefore not be interpreted as evidence of a between-group difference.

**eMethods 5. Software and reproducibility**

Analyses were conducted in Python 3 with pandas 2.3, numpy 1.26, statsmodels 0.14, scipy 1.13, lifelines 0.30, and matplotlib 3.9. The full analysis code (run_supplement_analyses.py and run_mi_sensitivity.py) and the de-identified individual-level dataset are deposited in the project repository (see Data Transparency Statement of the main manuscript).
